# Supplementary material
Source: HighWire-hosted journal article supplement (https://ard.bmj.com/content/annrheumdis-2016-210456)
Supplement: inline-supplementary-material-3 [file inline-supplementary-material-3.docx]

**Figure S1. Associations of week 16 clinical response with baseline biomarker levels.** Baseline levels (x-axis, log2-transformed) of (A) serum CRP, (B) serum IL-6, (C) ESR, and (D) blood neutrophil density are stratified by week 16 clinical response groups indicated on y-axis. Data presented as symbols representing individual participants and summarized by box (inter-quartile range and median) & whiskers (range), with ‘+’ indicating mean. Significance of associations is reported in **Table S2**. CRP = C-reactive protein. ESR = erythrocyte sedimentation rate. IL-6 = interleukin-6. JIA-ACR 30/50/70/90 = ≥30/50/70/90% improvement in Juvenile Idiopathic Arthritis-American College of Rheumatology response criteria

**
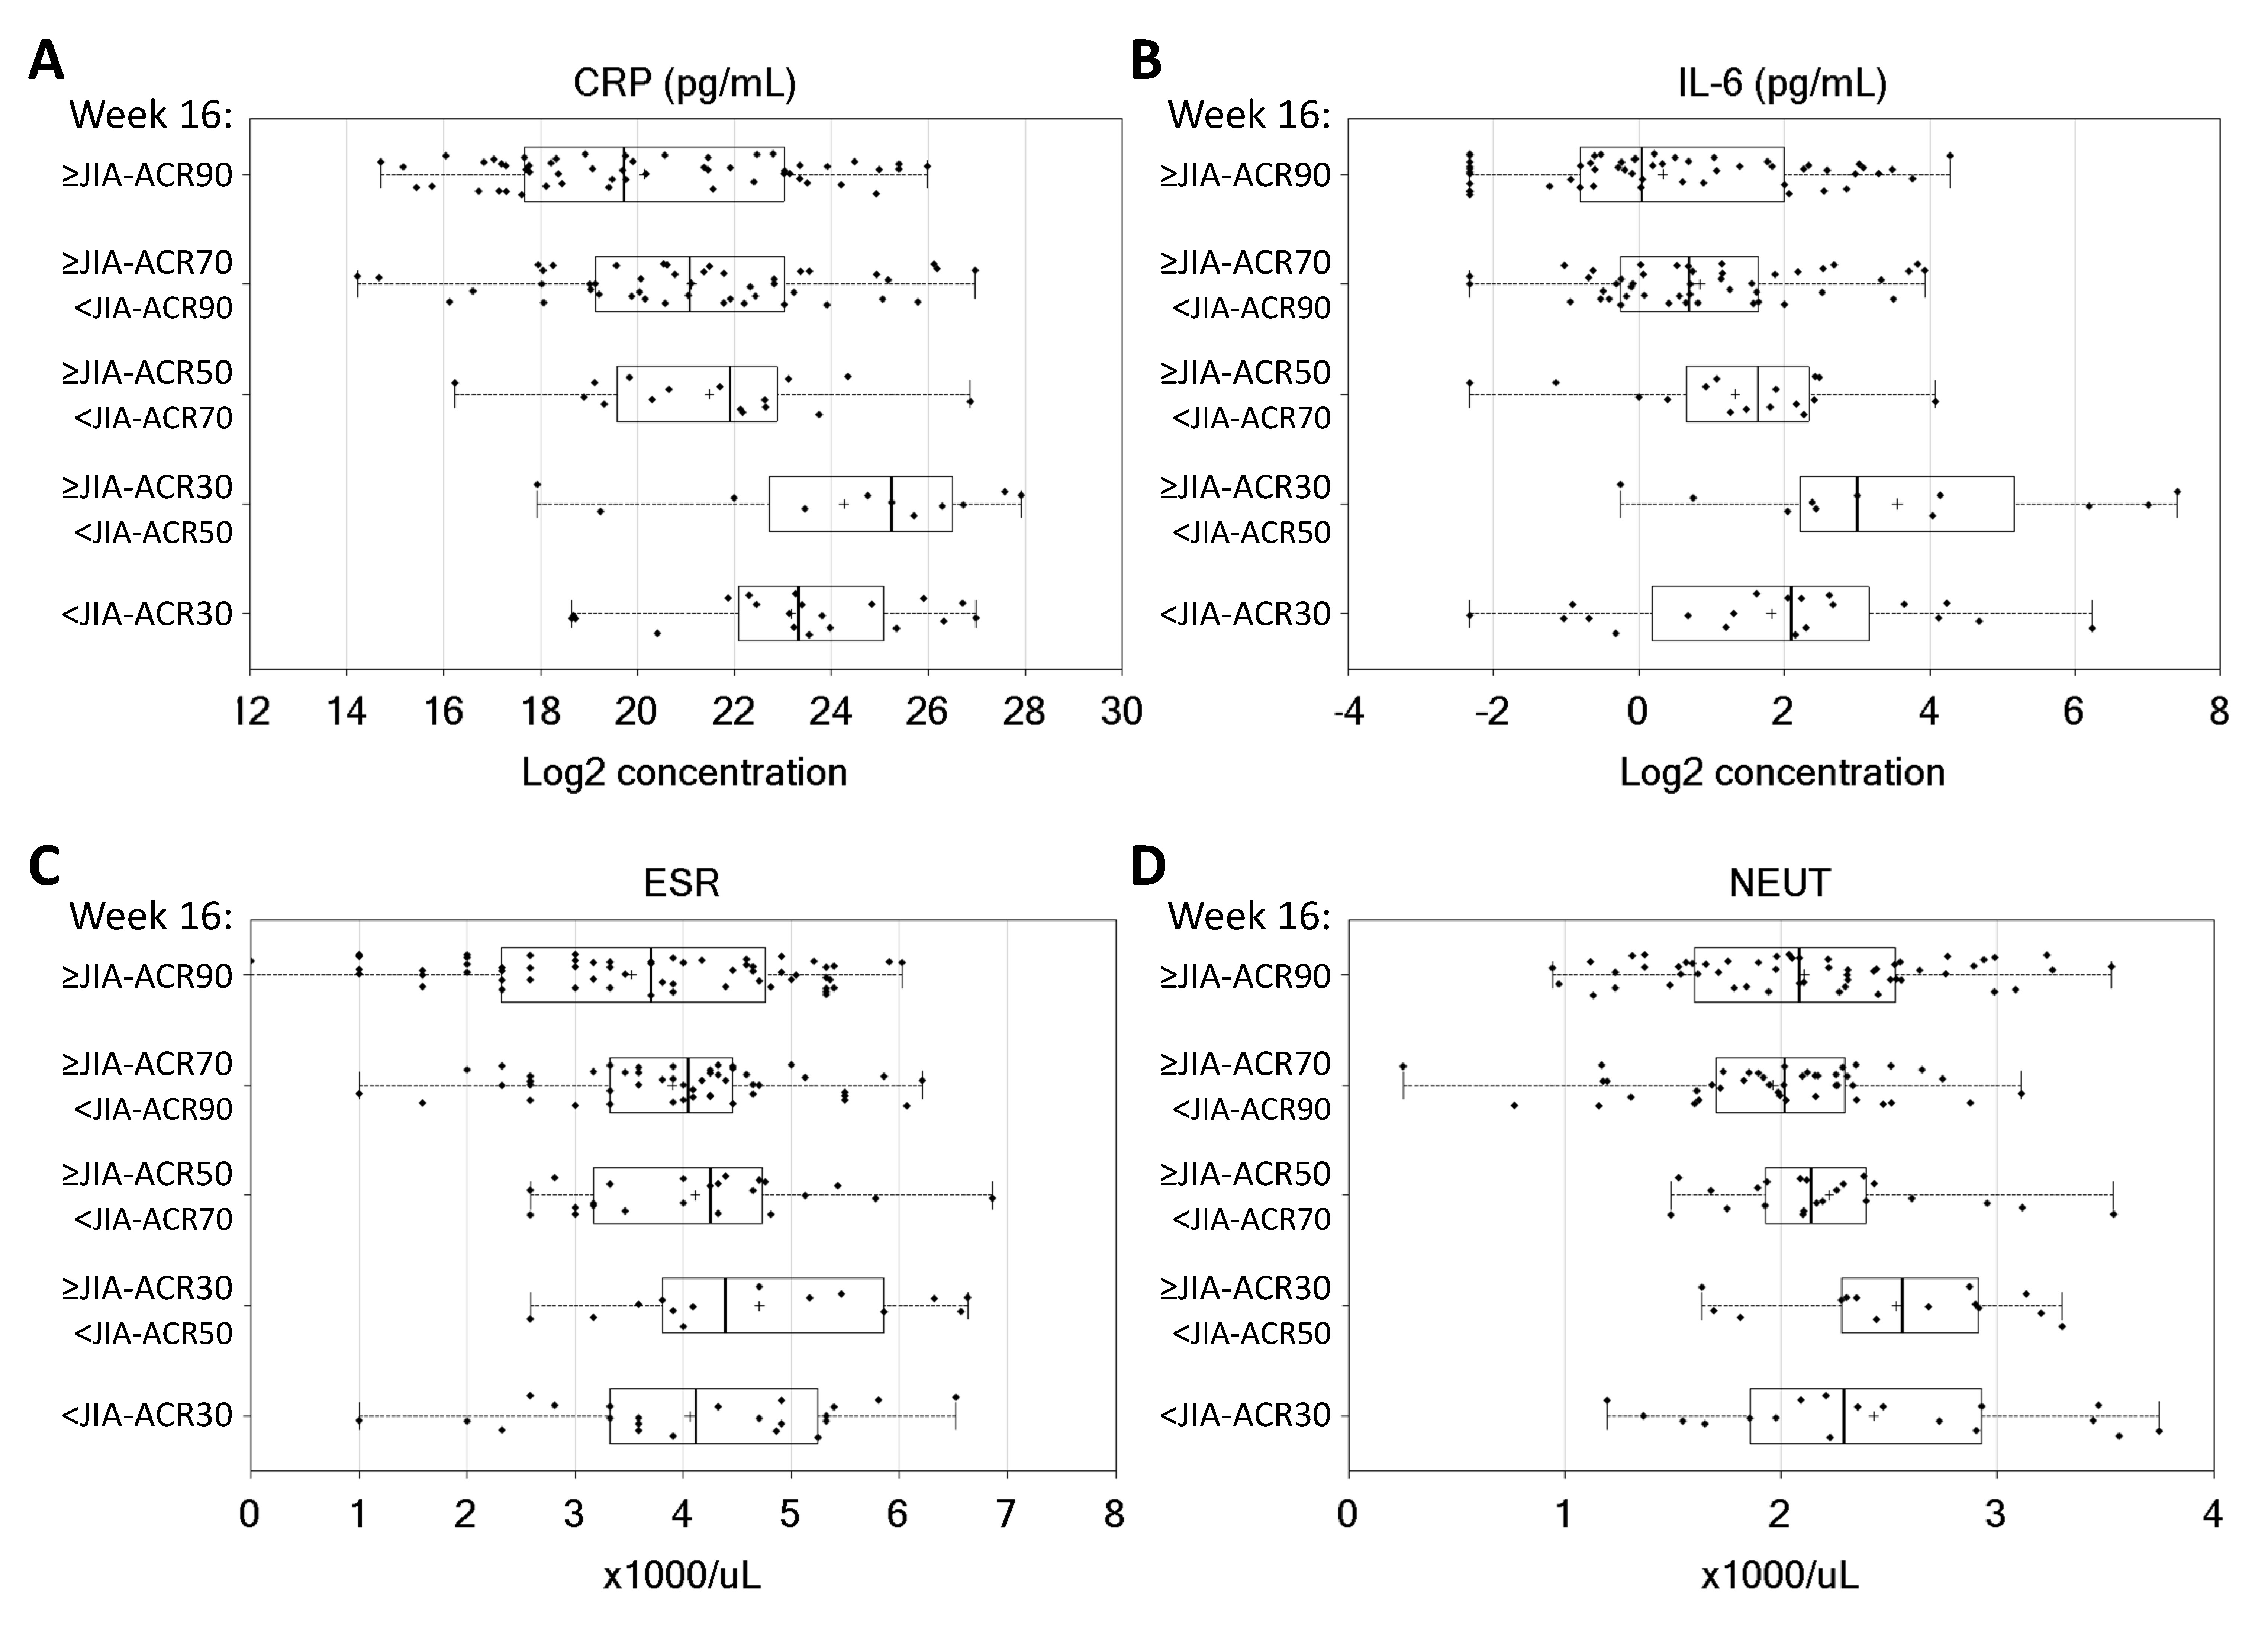
**
